# Supplementary material
Source: publisher site journal article supplement (https://www.dovepress.com/article/552361)
Supplement: Supplementary file 1 [file 552361_Supplementary%20File.docx]

**Supplementary Table 1:** Permanent Implant Participants' Demographics and Baseline Characteristics Comparison Based on Outcomes

| **Variables** | **All Patients (N=389)** | **Implant Success (N=298)** | **Implant Failed (N=91)** | **P-Value** |
| --- | --- | --- | --- | --- |
| **Age (years), mean ± SD** | 67.2 ± 12.3 | 68.2 ± 12.2 | 63.8 ± 12.0 | 0.003 |
| Less than 65 years old | 135 (34.7) | 79 (26.5) | 56 (61.5) | < 0.01 |
| 65 years old or older | 254 (65.3) | 219 (73.5) | 35 (38.5) |  |
| **Sex** |  |  |  |  |
| Female | 254 (65.3) | 186 (62.4) | 68 (74.7) | 0.031 |
| Male | 135 (34.7) | 112 (37.6) | 23 (25.3) |  |
| **BMI, mean ± SD** | 32.1 ± 7.5 | 31.6 ± 7.4 | 33.6 ± 7.7 | 0.024 |
| Underweight | 8 (2.1) | 7 (2.3) | 1 (1.1) | 0.462 |
| Normal | 53 (13.6) | 42 (14.1) | 11 (12.1) | 0.625 |
| Overweight | 103 (26.5) | 87 (29.2) | 16 (17.6) | 0.028 |
| Obesity | 225 (57.8) | 162 (54.4) | 63 (69.2) | 0.012 |
| **Drug use history (marijuana)** | 105 (27.0) | 56 (18.8) | 49 (53.8) | < 0.01 |
| **Drug use history** | 38 (9.8) | 18 (6.0) | 20 (22.0) | < 0.01 |
| **Depression** | 99 (25.4) | 39 (13.1) | 60 (65.9) | < 0.01 |
| **Chronic Opioid use** | 84 (21.6) | 31 (10.4) | 53 (58.2) | < 0.01 |
| **Main Diagnosis** |  |  |  |  |
| Post Laminectomy Syndrome (PLS) | 236 (60.7) | 183 (61.4) | 53 (58.2) | 0.558 |
| Complex Regional Pain Syndrome (CRPS) | 68 (17.5) | 46 (15.4) | 22 (24.2) | 0.055 |
| Non-Surgical Refractory Back Pain (NSRBP) | 49 (12.6) | 39 (13.1) | 10 (11.0) | 0.598 |
| Diabetes Mellitus Neuropathy (DM) | 36 (9.3) | 30 (10.1) | 6 (6.6) | 0.317 |
| **Device type** |  |  |  |  |
| Nevro | 313 (80.5) | 242 (81.2) | 71 (78.0) | 0.502 |
| Medtronic | 4 (1.0) | 2 (0.7) | 2 (2.2) | 0.206 |
| Abbott | 66 (17.0) | 48 (16.1) | 18 (19.8) | 0.414 |
| Boston Scientific | 9 (2.3) | 7 (2.3) | 2 (2.2) | 0.933 |
| **Baseline VAS** | 8.5 ± 0.9 | 8.4 ± 0.9 | 8.7 ± 0.9 | 0.018 |
| **Baseline DOI** | 40.2 ± 17.5 | 39.6 ± 16.8 | 42.0 ± 19.5 | 0.264 |
| **Trial Success Rate, mean ± SD** | 66.8 ± 14.5 | 67.4 ± 14.7 | 64.7 ± 14.0 | 0.120 |
| Success 50-60% | 136 (35.1) | 99 (33.3) | 37 (40.7) | 0.200 |
| Success 60-70% | 59 (15.2) | 43 (14.4) | 16 (17.8) | 0.438 |
| Success 70-80% | 105 (27.0) | 84 (28.2) | 21 (23.1) | 0.336 |
| Success 80-90% | 49 (12.6) | 40 (13.4) | 9 (9.9) | 0.374 |
| Success 90-100% | 39 (10.0) | 31 (10.4) | 8 (8.8) | 0.654 |
| **Fall After Implant** | 53 (13.6) | 13 (4.4) | 40 (44.0) | < 0.01 |

**Supplementary Table 2:** Comparison of Outcomes by Follow-Up Duration (<18 months vs. ≥18 months).

| **Variables** | **All Patients (N=389), NO (%)** | **<18 months (N = 271)** | **≥18 months (N = 118)** | **p-value** |
| --- | --- | --- | --- | --- |
| **Follow-up period (Months), mean ± SD** | 13.4 ± 8.3 | 8.9±4.5 | 23.9±5.0 | < 0.01 |
| **Implant success** | 298 (76.6) | 202(74.5) | 96(81.4) | .144 |
| **Implant failed** | 91 (23.4) | 69(25.5) | 22(18.6) |
| **Opioid Use** |  |  |  | .325 |
| Lower | 229 (58.9) | 155(57.2) | 74(62.7) |
| Same | 151 (38.8) | 108(39.9) | 43(36.4) |
| Increased | 9 (2.3) | 8(3.0) | 1(0.8) |
| **Device Explant** | 55 (14.1) | 42(15.5) | 13(11.0) | .244 |
| **Main Reason for Explant** |  |  |  | .158 |
| Loss of Efficacy | 30 (7.7) | 23(8.5) | 7(5.9) |
| Need for Imaging | 5 (1.3) | 2(0.7) | 3(2.5) |
| Complications | 20 (5.1) | 17(6.3) | 3(2.5) |
| **Complications** |  |  |  |  |
| Lead migration | 7 (1.8) | 7(2.6) | 0(0.0) | .078 |
| Infection | 5 (1.3) | 3(1.1) | 2(1.7) | .636 |
| Pain at the site of implant | 4 (1.0) | 3(1.1) | 1(0.8) | .816 |
| Mechanical breakdown | 3 (0.8) | 3(1.1) | 0(0.0) | .251 |
| Rash | 1 (0.3) | 1(0.4) | 0(0.0) | .509 |
